# Supplementary material
Source: PubMed Central journal article supplement (PMC4564841)
Supplement: jp510735f_si_001.pdf [file jp510735f_si_001.pdf]

**Structural Dynamics and Thermostabilization of Neurotensin Receptor 1**

Sangbae Lee,<sup>†</sup> Supriyo Bhattacharya,<sup>†</sup> Christopher G. Tate,<sup>§</sup> Reinhard Grisshammer,<sup>‡</sup> and  
Nagarajan Vaidehi<sup>†,\*</sup>

<sup>†</sup>Division of Immunology, Beckman Research Institute of the City of Hope, 1500 East Duarte Road, Duarte, California 91010, United States

<sup>‡</sup>Membrane Protein Structure Function Unit, National Institute of Neurological Disorders and Stroke, National Institute of Health, Department of Health and Human Services, Rockville, Maryland 20852, United States

<sup>§</sup>MRC Laboratory of Molecular Biology, Cambridge Biomedical Campus, Francis Crick Avenue, Cambridge CB2 0QH, U.K.

**Supplementary Information**

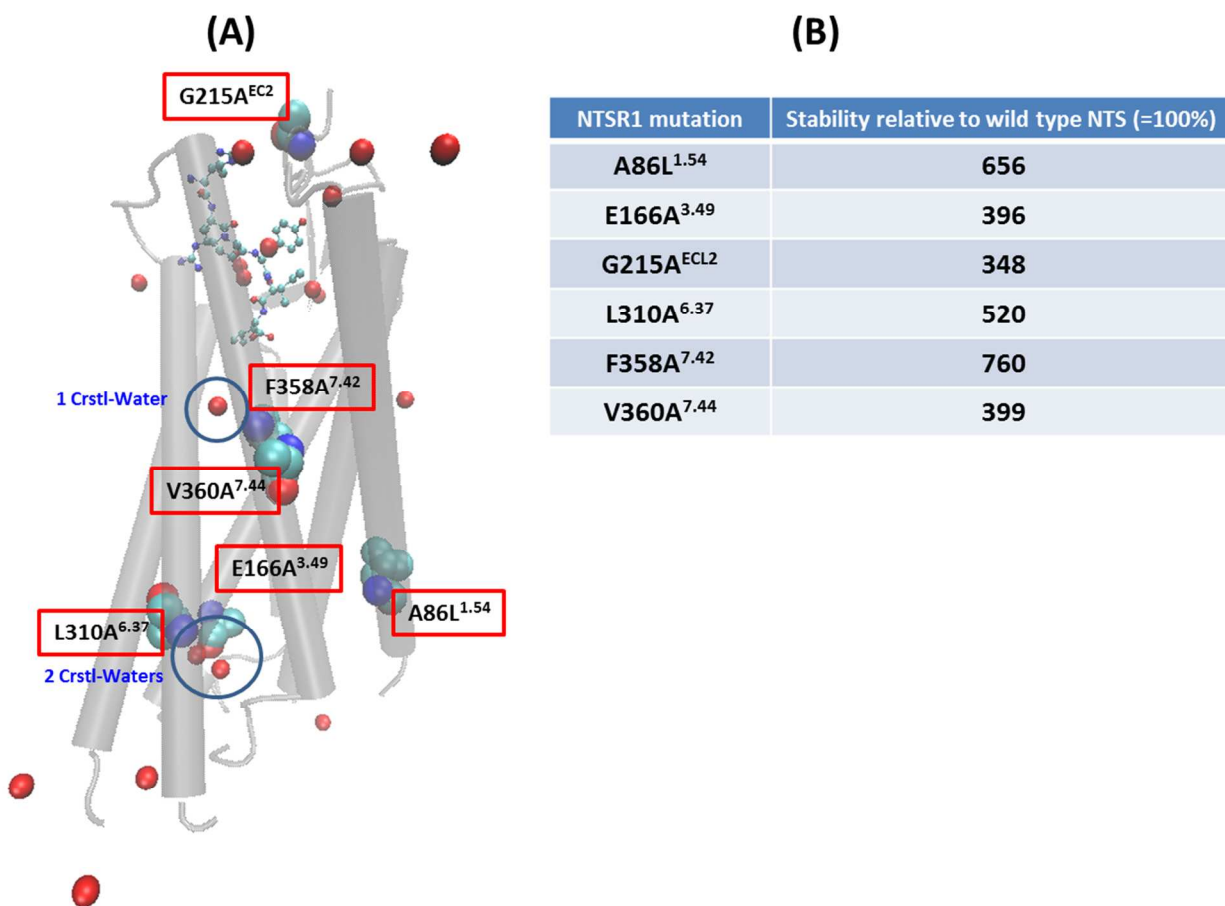

**Figure S1.** The crystal structure information of the neurotensin receptor (NTSR1-4GRV). **(A)** The crystal structure of NTSR1-GW5 (called NTSR1-4GRV) including the six mutations (red box) and crystal waters within 4Å from each mutation (blue circles). **(B)** Experimental stability of single residue NTSR1 mutants measured in the presence of the full length [<sup>3</sup>H]NTS. All experimental stability measurements are with respect to the stability of wild type NTSR1 and taken from Shibata et al. (2013).<sup>(1)</sup>

**Table S1.** The  $C_{\alpha}$  distance between R<sup>3.50</sup> and E(L)<sup>6.30</sup> in various crystal structures of GPCRs.

| Receptor          | Inactive State           | Active State               |
|-------------------|--------------------------|----------------------------|
| $\beta_2$ AR      | 11.2Å (2RH1)             | 17.2Å (3P0G), 18.0Å (3SN6) |
| A <sub>2A</sub> R | 7.3Å (3PWH), 9.7Å (3EML) | 9.9Å (2YDO)                |
| Rhodopsin         | 8.7Å (1GZM), 9.1Å (1U19) | 14.5Å (2X72), 14.7Å (3PQR) |
| M <sub>2</sub>    | 14.1Å (3UON)             | 15.5Å (4MQS), 15.8Å (4MQT) |
| $\delta$ -Opioid  | 9.3Å (4N6H)              |                            |
| PAR1              | 9.0Å (3VW7)              |                            |
| NTSR1             | 8.0Å (4BUO)              | 14.0Å (4GRV)               |

**Table S2.** Side chain distance of P<sup>5.50</sup> - F<sup>6.44</sup> in various crystal structures of GPCRs.

| Receptor          | Inactive State           | Active State             |
|-------------------|--------------------------|--------------------------|
| $\beta_2$ AR      | 7.8Å (2RH1)              | 5.6Å (3P0G), 5.1Å (3SN6) |
| A <sub>2A</sub> R | 7.6Å (3PWH), 7.9Å (3EML) | 4.7Å (2YDO)              |
| Rhodopsin         | 7.5Å (1GZM), 7.9Å (1U19) | 4.2Å (2X72), 3.9Å (3PQR) |
| M <sub>2</sub>    | 6.5Å (3UON)              | 5.1Å (4MQS), 5.3Å (4MQT) |
| $\delta$ -Opioid  | 12.3Å (4N6H)             |                          |
| PAR1              | 3.8Å (3VW7)              |                          |
| NTSR1             | 6.1Å (4BUO)              | 4.3Å (4GRV)              |

**Table S3.** Inter-residue distance between the alpha carbons of R<sup>3.50</sup> and Y<sup>7.53</sup> in various crystal structures of GPCRs.

| Receptor          | Inactive State             | Active State               |
|-------------------|----------------------------|----------------------------|
| $\beta_2$ AR      | 16.8Å (2RH1)               | 11.3Å (3P0G), 12.1Å (3SN6) |
| A <sub>2A</sub> R | 15.8Å (3PWH), 16.1Å (3EML) | 11.6Å (2YDO)               |
| Rhodopsin         | 15.8Å (1GZM), 15.5Å (1U19) | 12.7Å (2X72), 12.8Å (3PQR) |
| M <sub>2</sub>    | 17.6Å (3UON)               | 11.4Å (4MQS), 11.5Å (4MQT) |
| $\delta$ -Opioid  | 15.7Å (4N6H)               |                            |
| PAR1              | 11.7Å (3VW7)               |                            |
| NTSR1             | 15.9Å (4BUO)               | 11.9Å (4GRV)               |

**Table S4.** The center of mass (COM) distance of 5 residues in intracellular TM2 and TM6 in various crystal structures of GPCRs.

| Receptor          | Inactive State             | Active State               |
|-------------------|----------------------------|----------------------------|
| $\beta_2$ AR      | 18.2Å (2RH1)               | 26.6Å (3P0G), 29.7Å (3SN6) |
| A <sub>2A</sub> R | 19.4Å (3PWH), 19.0Å (3EML) | 21.6Å (2YDO)               |
| Rhodopsin         | 17.0Å (1GZM), 16.4Å (1U19) | 24.9Å (2X72), 23.2Å (3PQR) |
| M <sub>2</sub>    | 14.6Å (3UON)               | 25.8Å (4MQS), 26.0Å (4MQT) |
| $\delta$ -Opioid  | 17.7Å (4N6H)               |                            |
| PAR1              | 17.9Å (3VW7)               |                            |
| NTSR1             | 17.5Å (4BUO)               | 24.5Å (4GRV)               |

**Table S5.** Details of the different MD simulations on NTSR1 mutants and the wild type receptor.

|              | Ligand              | Simulation Time | Lipid | Mutations                                                                                                                                       |
|--------------|---------------------|-----------------|-------|-------------------------------------------------------------------------------------------------------------------------------------------------|
| NTSR1-GW5    | NTS <sub>8-13</sub> | 2,000 ns        | POPC  | A86L <sup>1.54</sup> , E166A <sup>3.49</sup> , G215A <sup>ECL2</sup> ,<br>L310A <sup>6.37</sup> , F358A <sup>7.42</sup> , V360A <sup>7.44</sup> |
| wt-NTSR1     | NTS <sub>8-13</sub> | 2,000 ns        | POPC  | N/A                                                                                                                                             |
| NTSR1-GW5-H8 | NTS <sub>8-13</sub> | 2,000 ns        | POPC  | A86L <sup>1.54</sup> , E166A <sup>3.49</sup> , G215A <sup>ECL2</sup> ,<br>L310A <sup>6.37</sup> , F358A <sup>7.42</sup> , V360A <sup>7.44</sup> |
| wt-NTSR1-H8  | NTS <sub>8-13</sub> | 2,000 ns        | POPC  | N/A                                                                                                                                             |

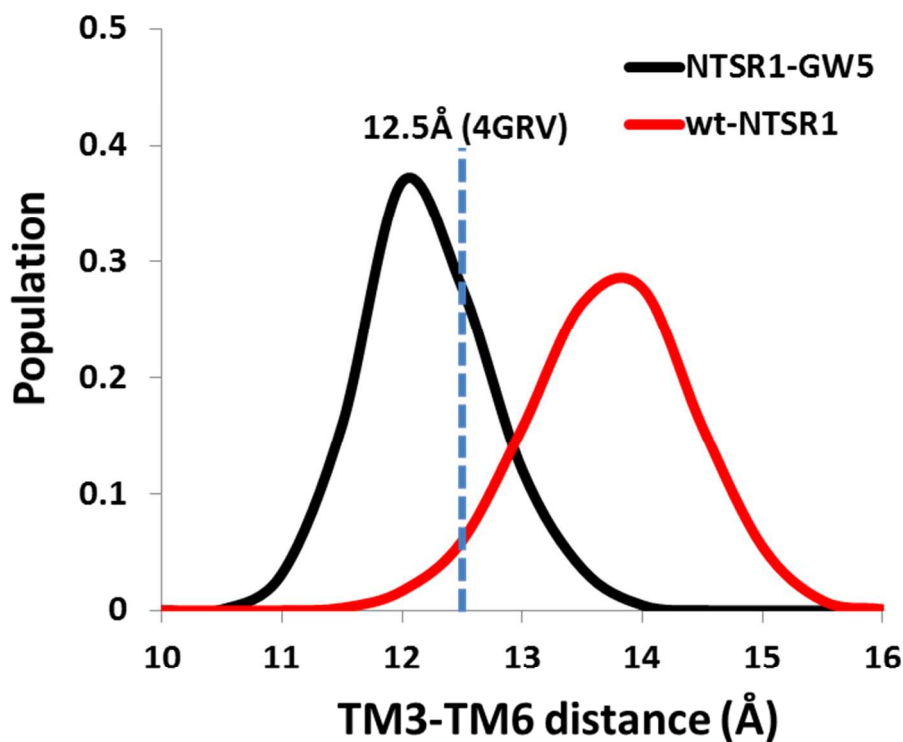**Figure S2.** The TM3-TM6 distance between COM (center of mass) of the last 3 turns of the intracellular region of TM3 and TM6 for NTSR1-GW5 (black) and wt-NTSR1 (red) simulations.

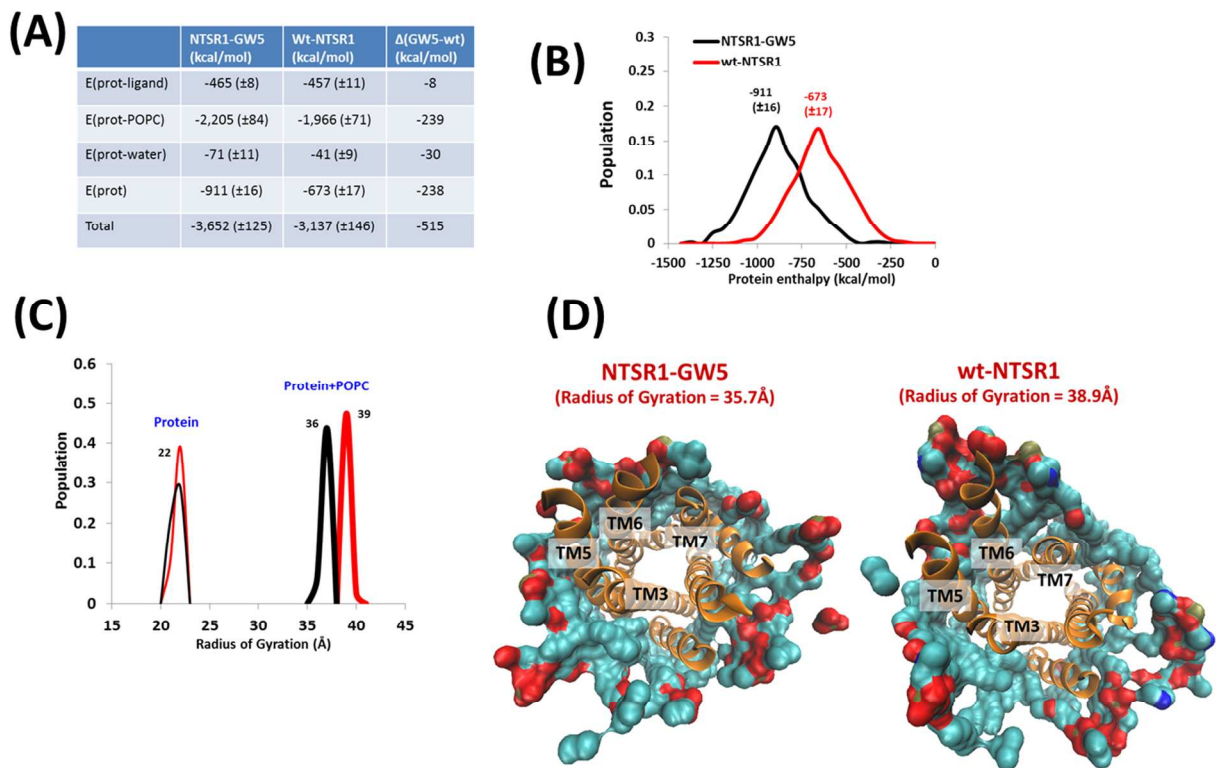

**Figure S3.** Calculated potential energy of the NTSR1-GW5 mutant and wt-NTSR1 receptor. **(A)** The protein energy and the protein-ligand, protein-POPC, and protein-water interaction energies are listed. The energy difference between NTSR1-GW5 and wt-NTSR1 is shown in last column. **(B)** Population distribution of protein potential energy for NTSR1-GW5 (black) and wt-NTSR1 (red). **(C)** Population distribution of the calculated radius of gyration which was calculated to analyze the lipid packing around the receptor. NTSR1-GW5 (black) and wt-NTSR1 (red). **(D)** A view of the lipid packing around the receptor of the representative structure from the most populated conformation cluster in the NTSR1-GW5 (left) and the wt-NTSR1 (right) (Intracellular view). The corresponding radius of gyration is also shown in this figure.

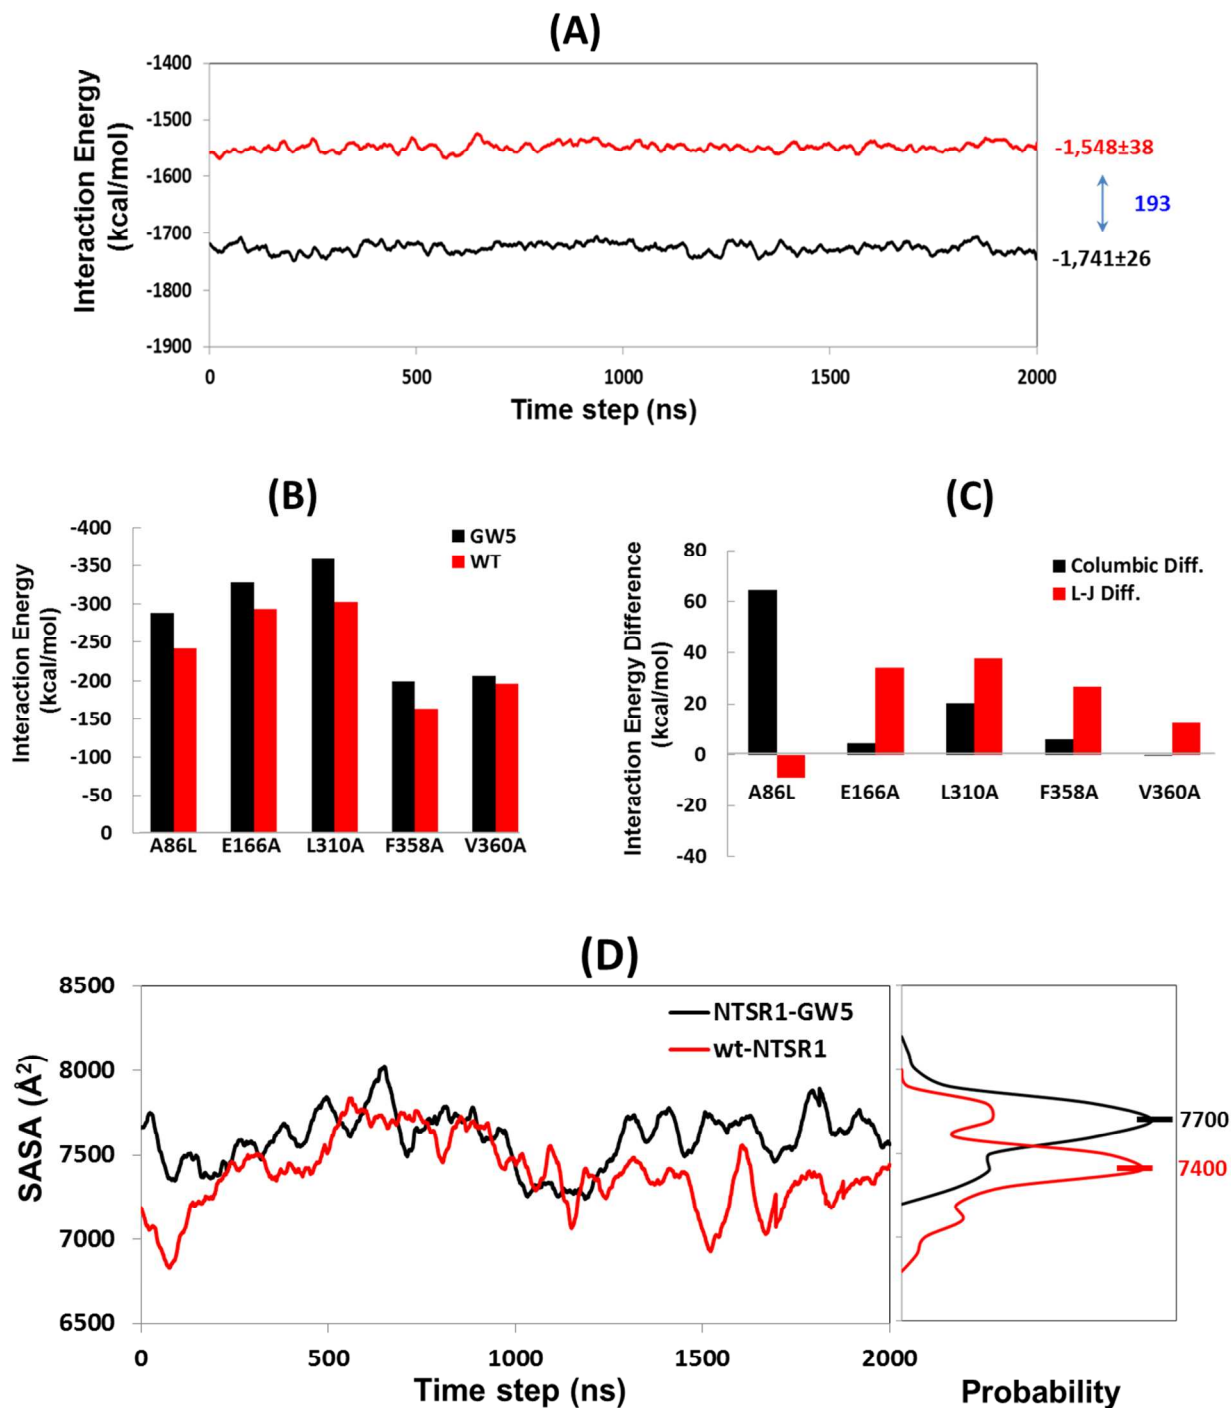

**Figure S4.** (A) The interaction energy between the lipid bilayer and the residues located within  $7\text{\AA}$  of the position of mutations in NTSR1-GW5 (black) and in the wild type (red). About 80% ( $193/239$  kcal/mol) of the favorable interaction is retrieved by interaction of the residues within  $7\text{\AA}$  of the mutation positions. (B) Non-bonded interaction energies between lipid and the residues within  $7\text{\AA}$  of each the mutation positions (wt-NTSR1 shown in red and NTSR1-GW5 in black). (C) Difference in the Coulombic and van der Waals components of the lipid-protein interaction

## Supporting Information

energies between the NTSR1-GW5 and the wt-NTSR1, for the residues in the vicinity of each mutation positions. **(D)** The solvent accessible surface area of the protein regions that are exposed to the lipid bilayer (calculated as described in the Methods section) in the NTSR1-GW5 and wt-NTSR1.

**Table S6.** Residue pairs showing interhelical hydrogen bond interactions for NTSR1-GW5 and wt-NTSR1 simulations during 2  $\mu$ s trajectories. The total number of hydrogen bond interactions is given within parenthesis in the column title.

|         | NTSR1-GW5 (#29) |         | wt-NTSR1 (#23) |         |
|---------|-----------------|---------|----------------|---------|
| TM1-TM2 | Y71-SC          | E124-SC | Y71-SC         | E124-SC |
|         | N82-SC          | A110-BB |                |         |
| TM1-TM7 | N82-SC          | S362-BB |                |         |
|         | N82-SC          | S362-SC |                |         |
| TM2-TM3 |                 |         | T101-SC        | E166-SC |
|         | H105-SC         | N159-SC | H105-SC        | N159-SC |
|         | H105-SC         | S162-SC |                |         |
|         | S108-SC         | N159-SC | S108-SC        | N159-SC |
|         |                 |         | S112-SC        | C152-BB |
|         |                 |         | S112-SC        | T156-SC |
|         | A120-BB         | Y145-SC |                |         |
|         | E124-SC         | Y145-SC |                |         |
|         |                 | E124-SC | R149-SC        |         |
| TM2-TM4 | S108-SC         | W194-SC | S108-SC        | W194-SC |
| TM2-TM7 | D113-SC         | S362-SC | D113-SC        | S362-SC |
|         | D113-SC         | N365-SC |                |         |
|         | M121-BB         | Y359-SC |                |         |
|         | E124-SC         | N355-SC | E124-SC        | N355-SC |
|         | E124-SC         | Y359-SC | E124-SC        | Y359-SC |
| TM3-TM4 | R143-SC         | L205-BB | R143-SC        | L205-BB |
|         | A155-BB         | S197-SC | A155-BB        | S197-SC |
| TM3-TM5 | D150-SC         | N241-SC | D150-SC        | N241-SC |
|         | Y154-SC         | N241-SC | Y154-SC        | N241-SC |
|         | 164-SC          | N257-SC |                |         |
| TM3-TM6 | R149-SC         | Y324-SC | R149-SC        | Y324-SC |
|         | D150-SC         | R328-SC | D150-SC        | R328-SC |
| TM3-TM7 | R149-SC         | N355-SC | R149-SC        | N355-SC |
|         | R149-SC         | Y359-SC | R149-SC        | Y359-SC |
|         |                 |         | R167-SC        | S373-SC |
| TM5-TM6 |                 |         | N241-SC        | R328-SC |
|         | S245-SC         | H325    |                |         |
| TM6-TM7 | R327-SC         | Y347    | R327-SC        | Y347-SC |
|         | R327-SC         | T354-SC | R327-SC        | T354-SC |
|         | R327-SC         | N355-SC |                |         |

The residue pairs that are within 5Å of one of the six mutated residues and forming an interhelical hydrogen bond are listed. The notation, N355-SC represents that the side chain of N355. The abbreviations SC and BB are for side-chain and backbone atoms, respectively.



**Table S7.** Residue pairs showing interhelical van der Waals interaction in NTSR1-GW5 and wt-NTSR1 simulations during 2  $\mu$ s trajectories.

|         | Total no. of interactions |       | Total no. of interactions |       |
|---------|---------------------------|-------|---------------------------|-------|
|         | NTSR1-GW5                 | (#69) | wt-NTSR1                  | (#54) |
| TM1-TM2 | T68                       | L125  | T68                       | L125  |
|         | Y71                       | M121  | Y71                       | M121  |
|         | F75                       | L117  |                           |       |
|         | F75                       | M121  | F75                       | M121  |
|         | T79                       | L114  |                           |       |
|         | A86L                      | A110  | T85                       | A110  |
|         | A86L                      | L114  |                           |       |
| TM1-TM7 | V67                       | M352  | V67                       | M352  |
|         | Y71                       | Y359  | Y71                       | Y359  |
|         | L74                       | A356  |                           |       |
|         | L74                       | V360A | L74                       | Y359  |
|         | L74                       | A363  |                           |       |
| TM2-TM3 | V102                      | L163  | T101                      | T186  |
|         |                           |       | V102                      | L163  |
|         |                           |       | Y104                      | C172  |
|         | L106                      | L163  |                           |       |
|         | L109                      | T156  | L109                      | T156  |
|         | L109                      | V160  | L109                      | V160  |
|         | L109                      | L163  |                           |       |
|         | I116                      | C152  | L115                      | C152  |
|         | L119                      | L148  | I116                      | C152  |
|         | A120                      | Y145  | L119                      | L148  |
| V123    | Y145                      | V123  | Y145                      |       |
| TM2-TM4 | Y104                      | I190  | Y104                      | I190  |
| TM2-TM7 | L106                      | Y369  | L106                      | Y369  |
|         |                           |       | L109                      | Y369  |
|         |                           |       | I116                      | Y359  |
|         | L117                      | Y359  |                           |       |
| A120    | Y359                      |       |                           |       |
| M121    | Y359                      |       |                           |       |
| TM3-TM4 | Y146                      | M204  |                           |       |
|         | F147                      | A198  |                           |       |
|         | F147                      | A201  | F147                      | A201  |
|         | F147                      | I202  |                           |       |
|         | F147                      | L205  | F147                      | L205  |
|         | A151                      | A201  |                           |       |
|         | Y154                      | L200  | Y154                      | L200  |
|         | A155                      | W194  | A155                      | W194  |
| L158    | I193                      | L158  | I193                      |       |
| TM3-TM5 | Y154                      | M244  | Y146                      | L256  |
|         | A157                      | P249  | Y154                      | M244  |
|         | V160                      | I253  |                           |       |
|         | V165                      | L256  | V165                      | L256  |
|         | Y168                      | L256  | Y168                      | L256  |
|         | Y168                      | V259  | Y168                      | V259  |
|         | Y168                      | I260  |                           |       |
|         | I171                      | L264  |                           |       |
|         | C172                      | I260  |                           |       |
| TM3-TM6 | T153                      | W321  | T153                      | W321  |
|         | V160                      | V313  | T156                      | W321  |
| TM3-TM7 |                           |       | Y146                      | Y351  |
|         |                           |       | V160                      | Y369  |
| TM4-TM5 | T207                      | V237  | T207                      | V237  |
| TM5-TM6 | V234                      | C332  |                           |       |
|         | I238                      | L329  | I238                      | L329  |

## Supporting Information

|         |      |       |      |      |
|---------|------|-------|------|------|
|         | I238 | C332  | I238 | C332 |
|         | F246 | F317  | F246 | F317 |
|         | F246 | W321  | F246 | W321 |
|         | F246 | L322  | F246 | L322 |
|         | M250 | F317  |      |      |
|         | M250 | V318  | M250 | V318 |
|         | I253 | V314  |      |      |
|         | I253 | F317  | I253 | F317 |
|         |      |       | I260 | A310 |
|         | A261 | V307  |      |      |
|         | L264 | L303  | L264 | L303 |
|         | L264 | V307  |      |      |
|         |      |       | T265 | L303 |
|         | T265 | V307  |      |      |
| TM6-TM7 |      |       | V309 | L371 |
|         |      |       | V309 | V372 |
|         |      |       | V313 | L368 |
|         | V319 | L357  |      |      |
|         | C320 | L357  |      |      |
|         | C320 | F358A | W321 | F358 |
|         |      |       |      |      |
|         | P323 | F350  |      |      |
|         | P323 | T354  | P323 | T354 |
|         | Y324 | T354  |      |      |
|         |      |       | Y324 | F358 |
|         | M330 | L343  | M330 | L343 |
|         |      |       | M330 | F350 |
|         | F331 | Y347  | F331 | Y347 |

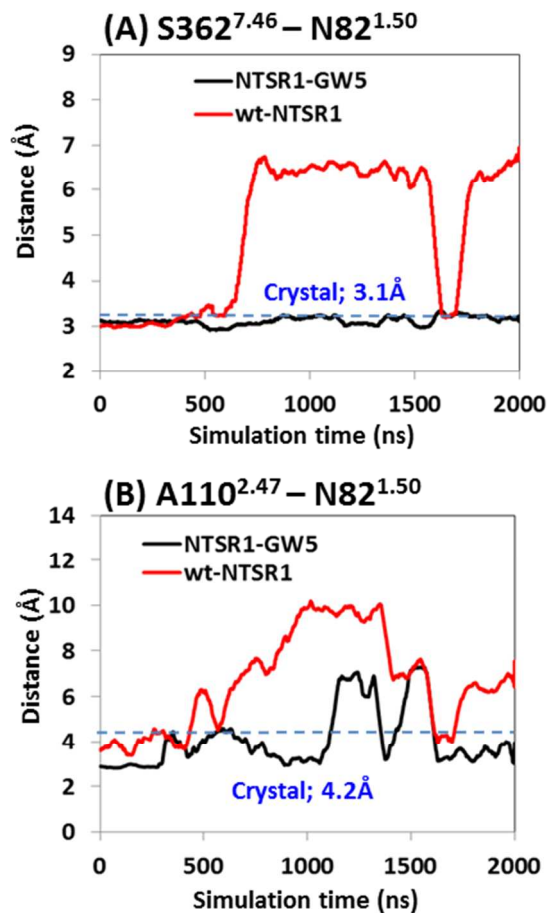

**Figure S5.** Interhelical hydrogen bond interactions close to A86L mutation in NTSR1-GW5 (black) and wt-NTSR1 (red). **(A)** S362<sup>7.46</sup>(O) – N82<sup>1.50</sup>(ND2), and **(B)** A110<sup>2.47</sup>(O) – N82<sup>1.50</sup>(ND2). Crystal structure distances for each interaction are shown as blue dotted-lines.

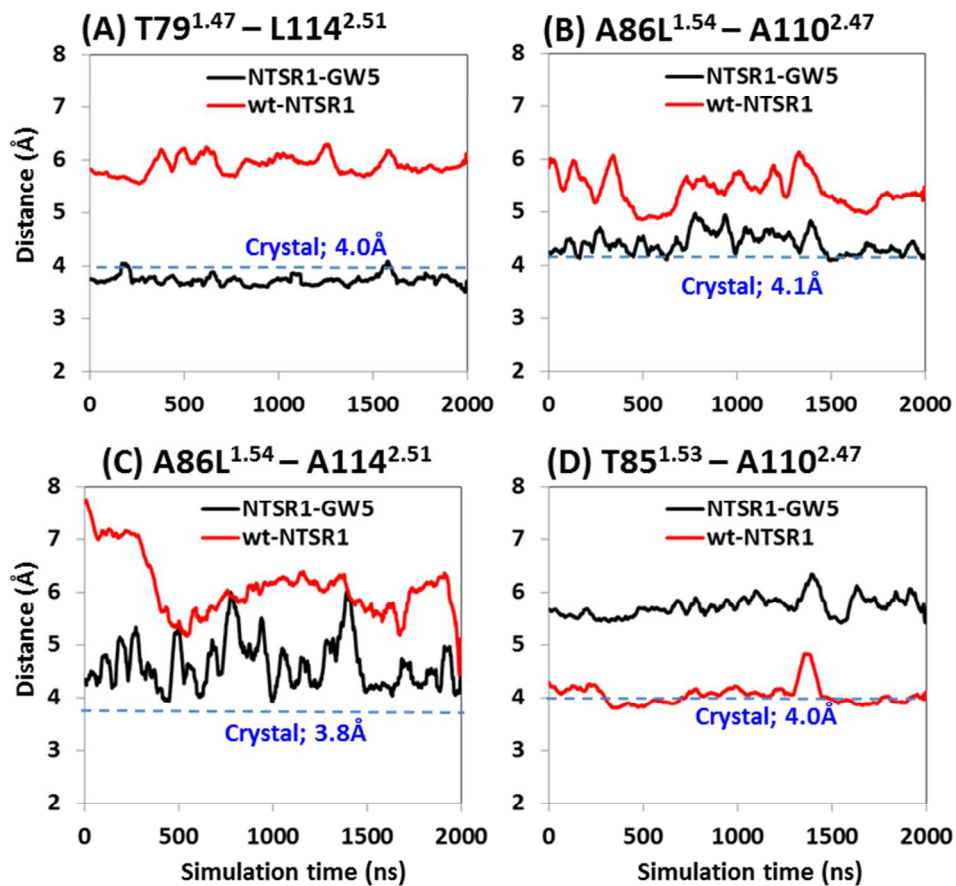

**Figure S6.** Time-dependent interhelical hydrophobic interactions near the A86L mutation in NTSR1-GW5 (black) and wt-NTSR1 (red). **(A)** T79<sup>1.47</sup> – L114<sup>2.51</sup>, **(B)** A86<sup>1.54</sup> – A110<sup>2.47</sup>, **(C)** A86L<sup>1.54</sup> – A114<sup>2.51</sup>, and **(D)** T85<sup>1.53</sup> – A110<sup>2.47</sup>. Crystal structure distances for each interaction are shown as blue dotted-lines.

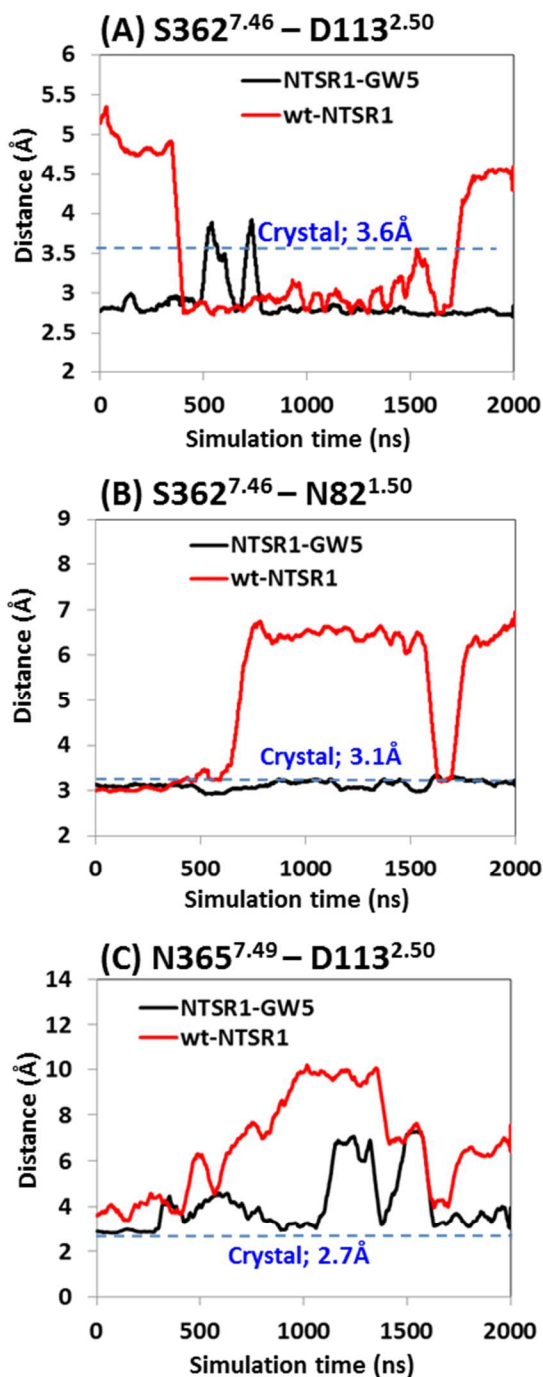

**Figure S7.** Interhelical hydrogen bond interactions near the V360A mutation in NTSR1-GW5 (black) and wt-NTSR1 (red). **(A)** S362<sup>7.46</sup>(OG) – D113<sup>2.50</sup>(OD\*), **(B)** S362<sup>7.46</sup>(O) – N82<sup>1.50</sup>(ND2), and **(C)** N365<sup>7.49</sup>(ND2) – D113<sup>2.50</sup>(OD\*). Crystal structure distances for each interaction are shown as dotted-lines.

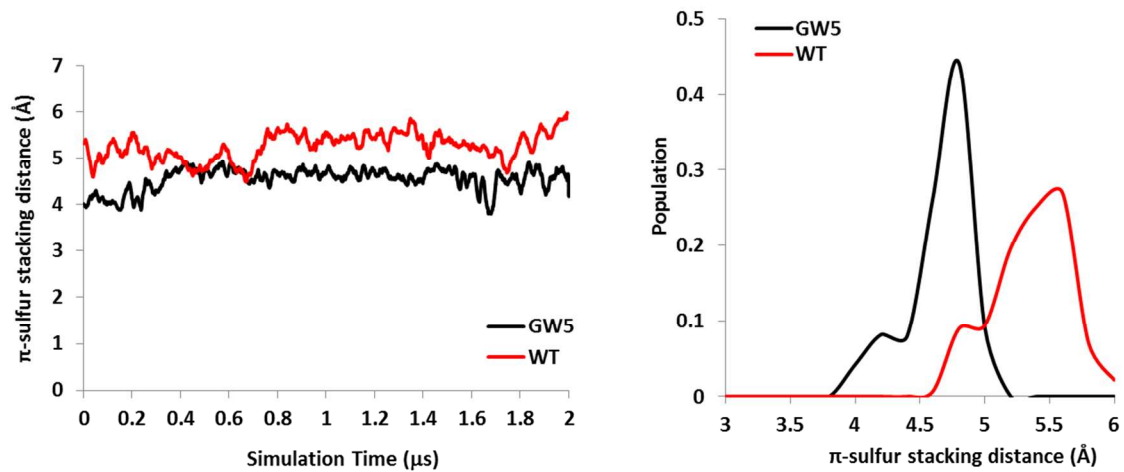

**Figure S8.**  $\pi$ -sulfur stacking pattern between M121<sup>2,58</sup> (Sulfur) and Y359<sup>7,43</sup> (center of mass of benzene ring) in NTSR1-GW5 (black) and wt-NTSR1 (red).

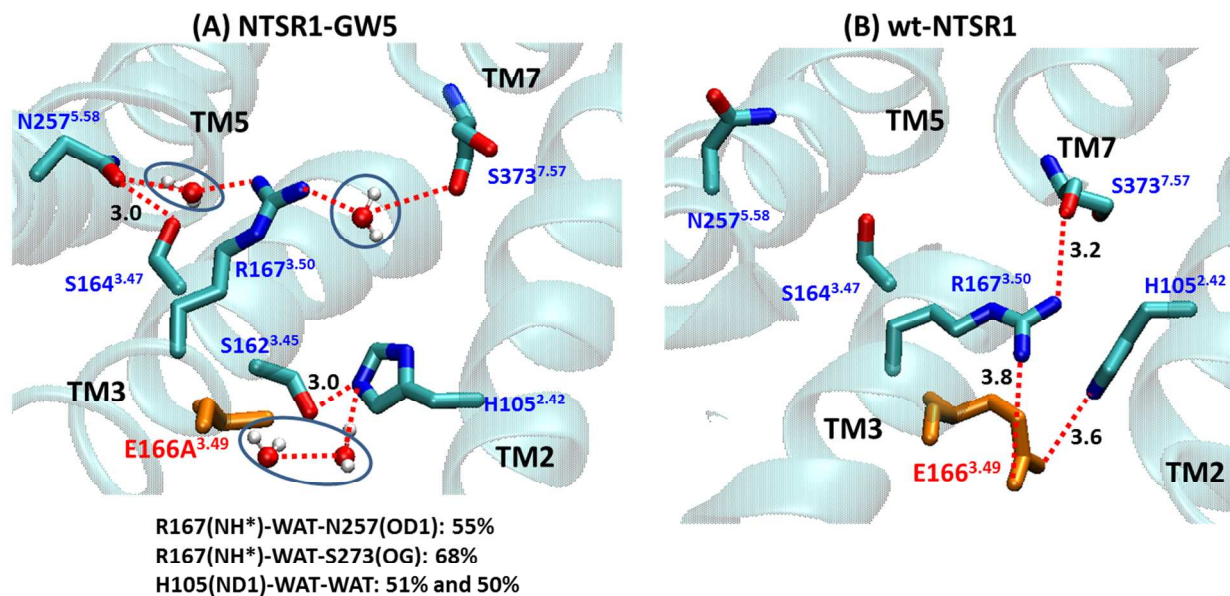

**Figure S9.** Effect of the mutation E166A<sup>3.49</sup> on the interhelical interactions in the neighborhood of the mutation. (A) Interhelical hydrogen bond interactions in NTSR1-GW5, and (B) corresponding snapshot in the wild type receptor. The percentage of the snapshots in the MD ensemble observed for each water is shown in the bottom of the figure.

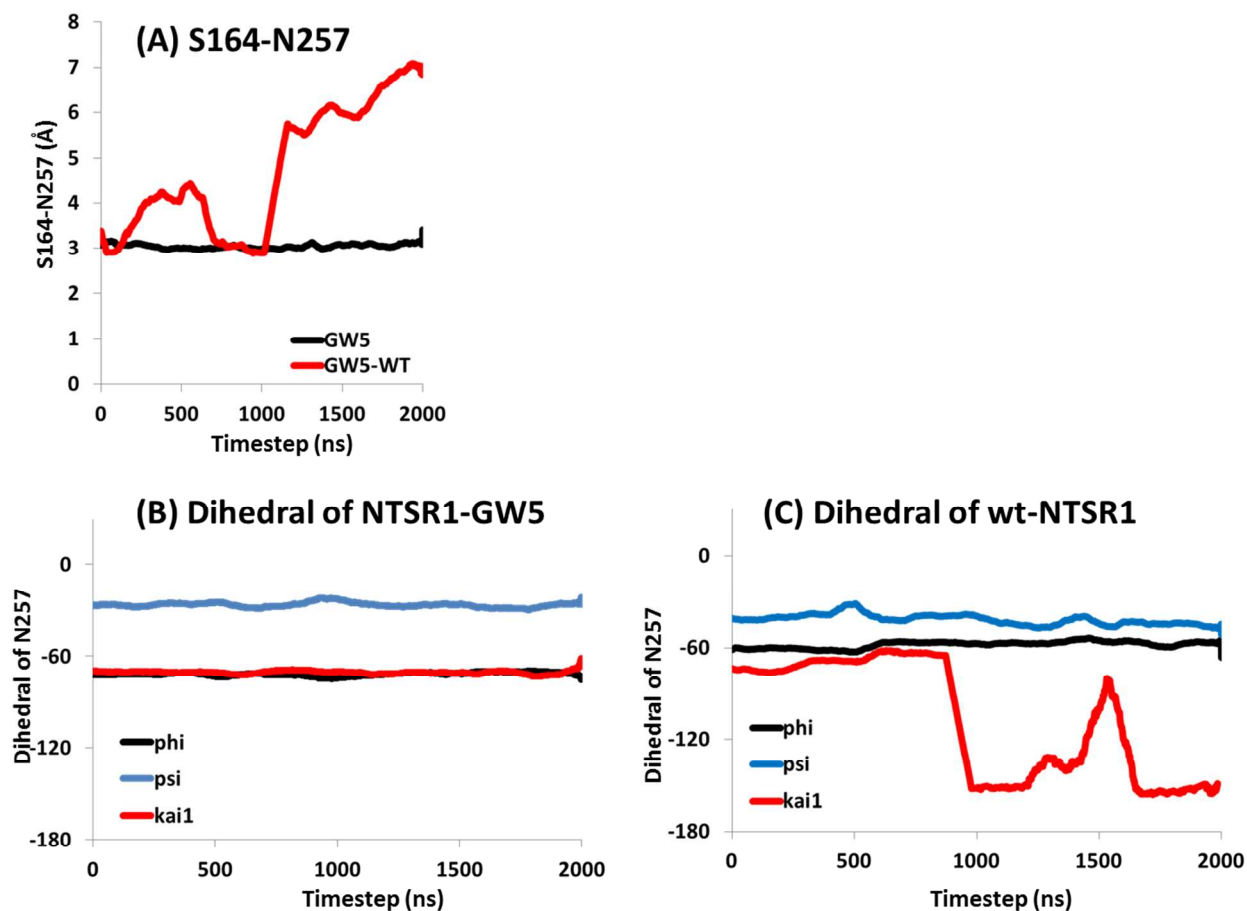

**Figure S10.** (A) The TM3-TM5 interhelical interaction as a function of time for S164<sup>3.47</sup> (TM3) and N257<sup>5.58</sup> (TM5). The distance between S164<sup>3.47</sup> (OG) and N257<sup>5.58</sup> (ND2) stays steady at the hydrogen bond interaction distance in NTSR1-GW5 (black) but breaks off in wt-NTSR1 (red). (B & C) The backbone and side chain dihedral angles of N257<sup>5.58</sup> in NTSR1-GW5 (B) and in wt-NTSR1 (C). The backbone dihedral *phi* and *psi* are shown as black and blue, and the side chain dihedral (*kai1*) is in red showing flexibility and rotation outwards.



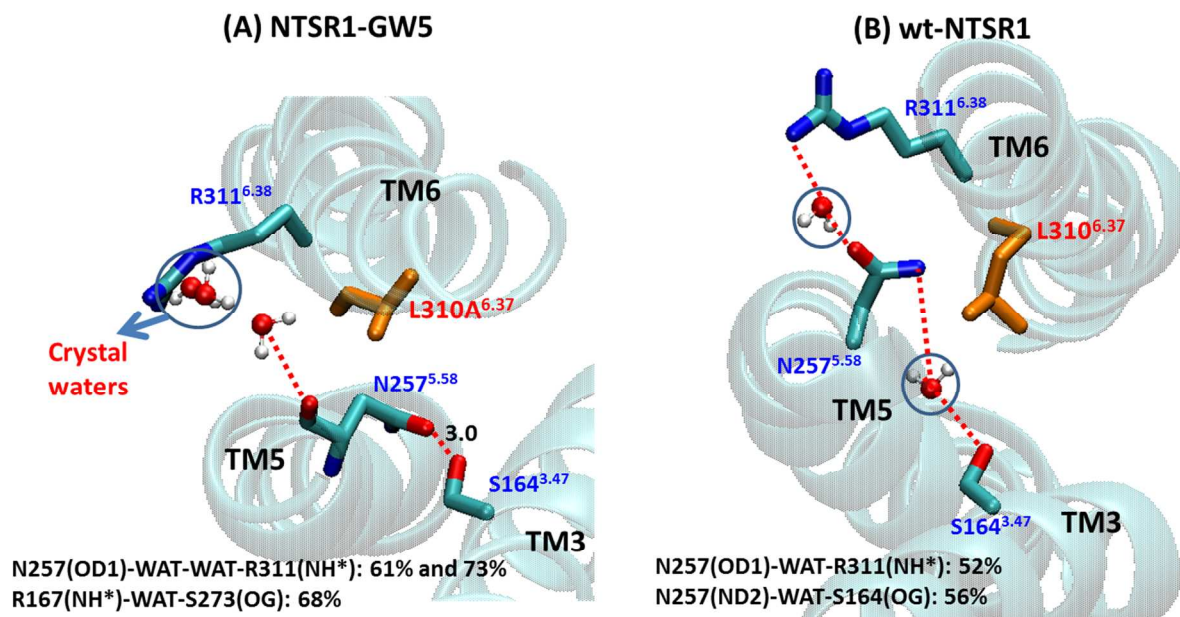

**Figure S11.** The effect of the mutation L310A<sup>6.37</sup> on the receptor thermostability. (A) The direct interhelical hydrogen bond interaction between N257<sup>5.58</sup> and S164<sup>3.47</sup> due to the neighboring mutation L310A<sup>6.37</sup> in NTSR1-GW5, and (B) the corresponding conformation in the wild type receptor. The percentage of the snapshots in the MD ensemble observed for each water is shown in the bottom of the figure.

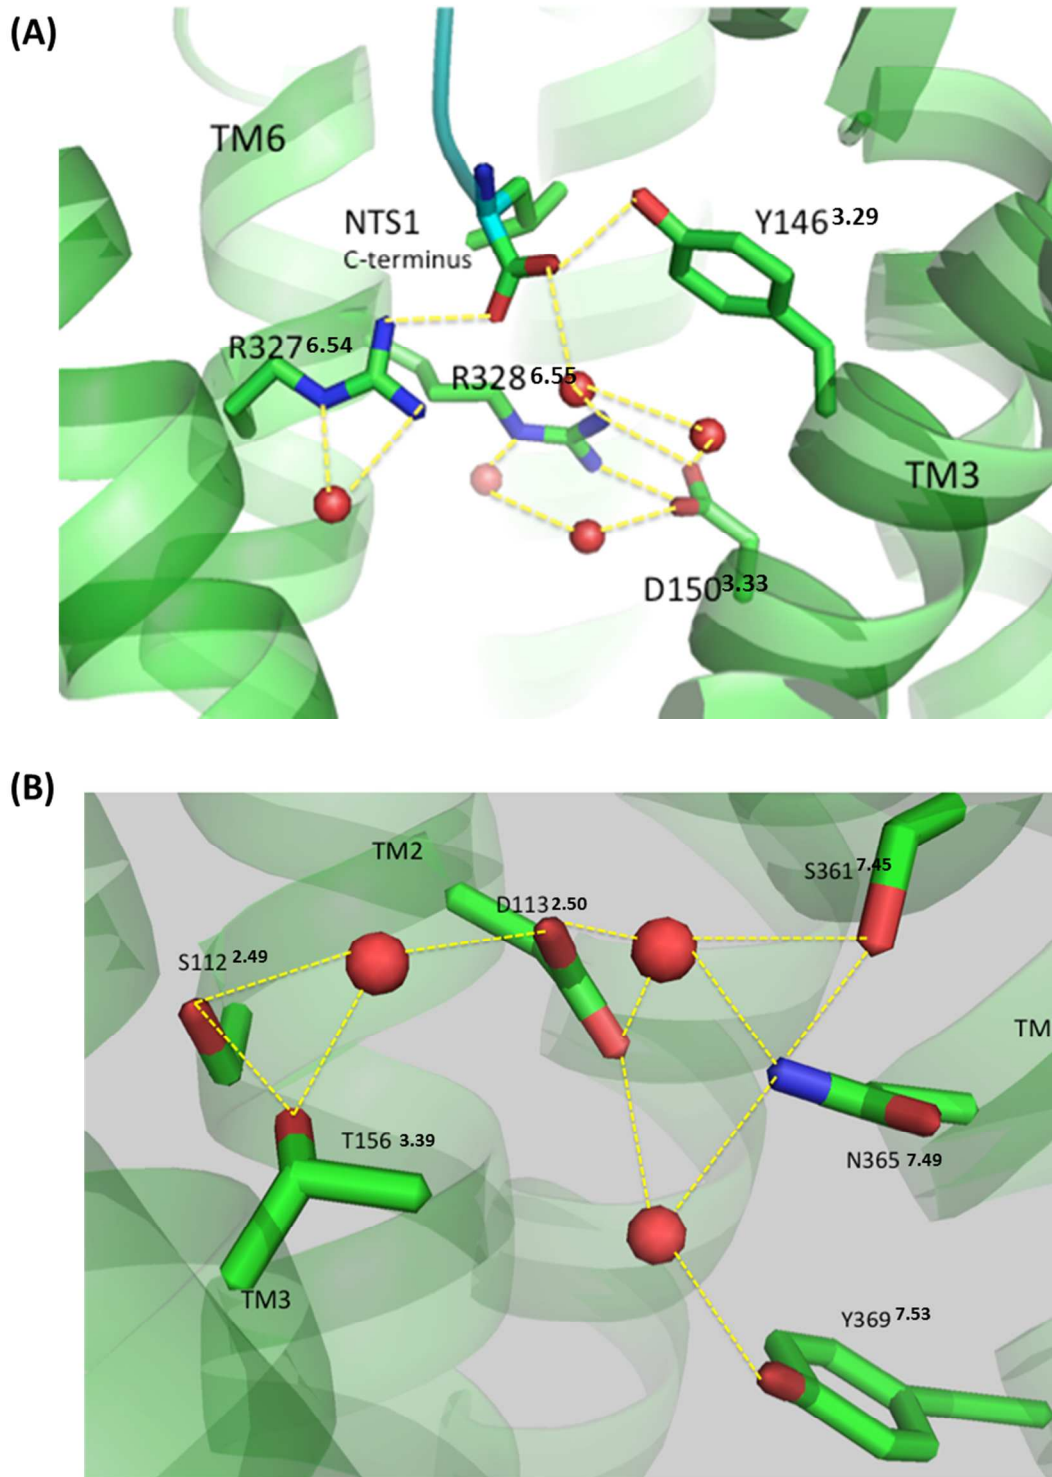

**Figure S12.** (A) Water clusters in NTSR1-GW5 forming hydrogen bond networks with the carboxy terminus of the NTS and the TM3 and TM6 in the extracellular region. (B) Water

mediated hydrogen bond networks between TM2, TM3 and TM7. All the distances shown in both the figures are within  $3.5\text{\AA}$ .

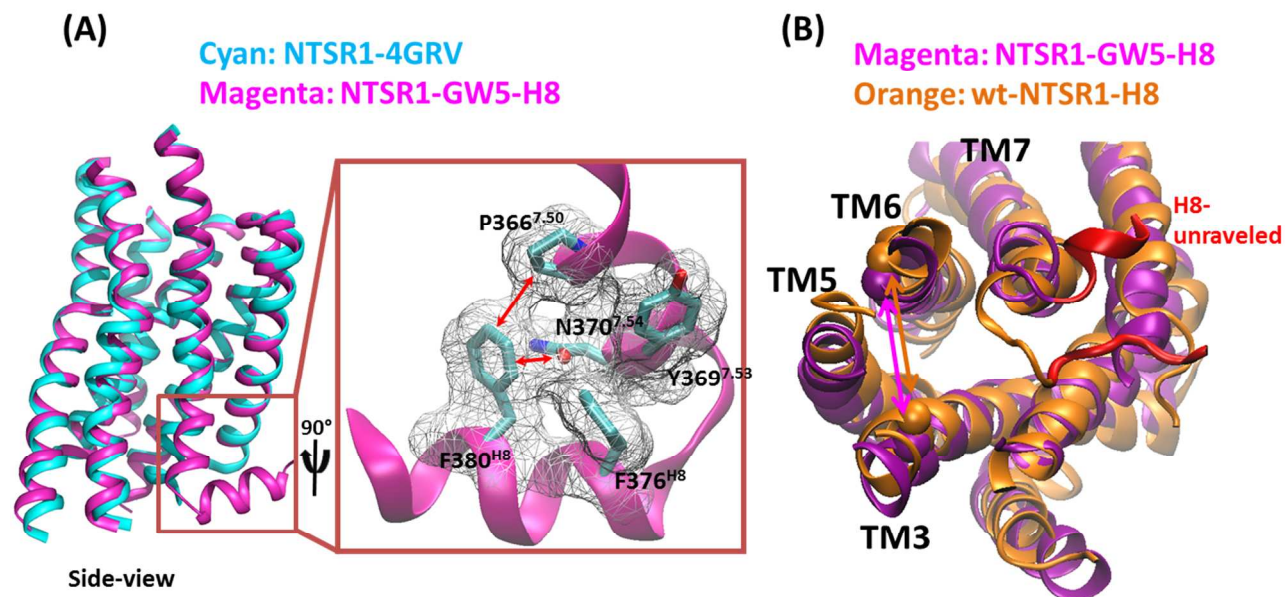

**Figure S13.** (A) Comparison of NTSR1-4GRV structure and the initial modeled NTSR1-GW5-H8. The NTSR1-4GRV crystal structure without helix 8 is shown in cyan and the equilibrated NTSR1-GW5-H8 with helix 8 built in is shown in magenta. Inset figure shows the steric hindrance between residues of TM7 and helix 8 in the NTSR1-GW5-H8 homology model. (B) Comparison of final snapshot of the homology models with addition of amphipathic helix 8. NTSR1 with helix 8 (NTSR1-GW5-H8) is shown in magenta, and wt-NTSR1-H8 is shown in orange. The unraveled helices 8 in NTSR1-GW5-H8 and in wt-NTSR1-H8 are shown in red color.

**Table S8.** Non-bonded interactions between residues of TM7 and helix 8 that would facilitate steric hindrance in the NTSR1-GW5-H8 homology model after equilibration.

|                                           | vdW interaction<br>(kcal/mol) | Coulombic interaction<br>(kcal/mol) | Min. contact distance<br>(Å) |
|-------------------------------------------|-------------------------------|-------------------------------------|------------------------------|
| P366 <sup>7.50</sup> – F380 <sup>H8</sup> | 6.9                           | -1.5                                | 4.0                          |
| N370 <sup>7.54</sup> – F380 <sup>H8</sup> | 6.6                           | -11.3                               | 3.3                          |

**Table S9.** The dynamics of residues in the helix 8 region during MD simulations of various class A GPCRs both in the inactive and active states. The residues highlighted in pink remain helical during MD simulations whereas residues with white background unraveled. The mustard colored structures are inactive states of various receptors and light-blue is in active or active-like states. The description of the systems is given in the table below.

| Sequence of Helix 8 for various GPCR simulations |      |      |      |      |      |      |      |      |      |      |      |      |      |      | System used |                             |           |                          |              |    |
|--------------------------------------------------|------|------|------|------|------|------|------|------|------|------|------|------|------|------|-------------|-----------------------------|-----------|--------------------------|--------------|----|
| 292I                                             | 293R | 294E | 295F | 296R | 297Q | 298T | 299F | 300R | 301K | 302I | 303I | 304R | 305S | 306H | 307V        | wt-3PWH (A <sub>2A</sub> R) | 1         |                          |              |    |
| 292I                                             | 293R | 294E | 295F | 296R | 297Q | 298T | 299F | 300R | 301K | 302I | 303I | 304R | 305S | 306H | 307V        | 3EML                        | 2         |                          |              |    |
| 444N                                             | 445A | 446T | 447F | 448K | 449K | 450T | 451F | 452K | 453H | 454L | 455L |      |      |      |             | 456M                        | 3UON (M2) | 3                        |              |    |
| 329S                                             | 330P | 331D | 332F | 333R | 334I | 335A | 336F | 337Q | 338E | 339L | 340L | 341C |      |      |             |                             | 342L      | 2RH1 (β <sub>2</sub> AR) | 4            |    |
| 387N                                             | 388I | 389E | 390F | 391R | 392K | 393A | 394F | 395L | 396K | 397I | 398L | 399S |      |      |             |                             | 400C      | 3PBL (D3)                | 5            |    |
| 472N                                             | 473E | 474N | 475F | 476K | 477K | 478T | 479F | 480K | 481R | 482I | 483L | 484H |      |      |             |                             | 485I      | 3RZE (H1)                | 6            |    |
| 292I                                             | 293R | 294E | 295F | 296R | 297Q | 298T | 299F | 300R | 301K | 302I | 303I | 304R | 305S | 306H | 307V        | wt-2YDO (A <sub>2A</sub> R) | 7         |                          |              |    |
| 444N                                             | 445A | 446T | 447F | 448K | 449K | 450T | 451F | 452K | 453H | 454L | 455L |      |      |      |             | 456M                        | 4MQS (M2) | 8                        |              |    |
| 444N                                             | 445A | 446T | 447F | 448K | 449K | 450T | 451F | 452K | 453H | 454L | 455L | 456M |      |      |             |                             | 457C      | 4MQT (M2)                | 9            |    |
| 329S                                             | 330P | 331D | 332F | 333R | 334I | 335A | 336F | 337Q | 338E | 339L | 340L | 341C | 342L | 343R | 344R        | 3P0G-wt (β <sub>2</sub> AR) | 10        |                          |              |    |
| 374A                                             | 375N | 376F | 377R | 378Q | 379V | 380F | 381F | 382S | 383T |      |      |      |      |      |             |                             |           | 384L                     | NTSR1-GW5-H8 | 11 |
| 374A                                             | 375N | 376F | 377R | 378Q | 379V | 380F | 381F | 382S | 383T |      |      |      |      |      |             |                             |           | 384L                     | wt-NTSR1-H8  | 12 |

  

| Secondary structure |       |       |        |
|---------------------|-------|-------|--------|
| Magenta             | Helix | White | Coiled |
|                     |       |       |        |

  

| System used                    | Explanation                                                                                   |
|--------------------------------|-----------------------------------------------------------------------------------------------|
| 1 wt-3PWH (A <sub>2A</sub> R)  | Wild type simulation of Inactive A <sub>2A</sub> R bound to ZM241385 under POPC bilayer       |
| 2 3EML                         | A2A Adenosine receptor bound to ZM241385                                                      |
| 3 3UON (M2)                    | M2 Muscarinic Acetylcholine receptor bound to Antagonist                                      |
| 4 2RH1 (β <sub>2</sub> AR)     | Human B2AR receptor bound to partial inverse agonist Carazolol                                |
| 5 3PBL (D3)                    | Human dopamine D3 receptor in complex with D2/D3 selective antagonist Eticlopride             |
| 6 3RZE (H1)                    | Human Histamine H1 receptor in complex with first generation antagonist Doxepin               |
| 7 wt-2YDO (A <sub>2A</sub> R)  | Wild type simulation of Active A2AR bound to Adenosine under POPC bilayer                     |
| 8 4MQS (M2)                    | Active M2 Muscarinic Acetylcholine receptor bound to Agonist Iperoxo                          |
| 9 4MQT (M2)                    | Active M2 Muscarinic Acetylcholine receptor bound to Agonist Iperoxo and allosteric modulator |
| 10 3P0G-wt (β <sub>2</sub> AR) | Wild type simulation of Nanobody-stabilized Active state of β <sub>2</sub> AR                 |
| 11 NTSR1-GW5-H8                | Mutant Simulation of Neurotensin Receptor NTSR1 bound to agonist NTS peptide ligand           |
| 12 wt-NTSR1-H8                 | Wild type Simulation of NTSR1 bound to agonist peptide ligand                                 |

  

| Blue | Active | Orange | Inactive |
|------|--------|--------|----------|
|      |        |        |          |

\*The helix 8 region of NTSR1-TM86V (pdb code 4BUO) was found to less stable than that other GPCRs. <sup>(2)</sup>

The MD simulations on systems 1, 2 and 7 have been published in reference 3 of the Supporting Information.

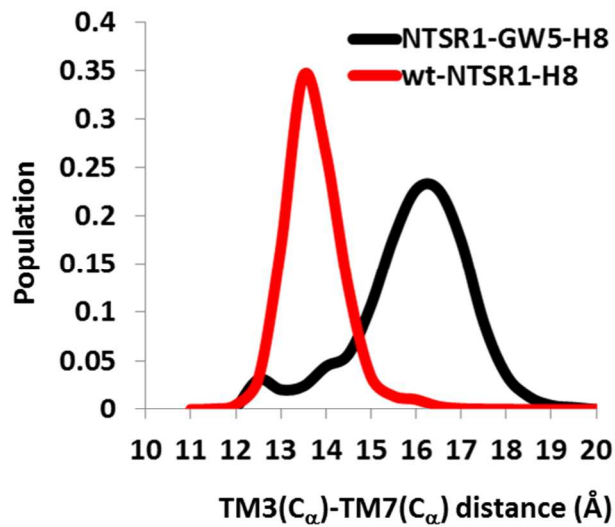

**Figure S14.** The population density variation with the inter-residue distance R3.50 – Y7.53 observed with the presence of helix 8 in the NTSR1-GW5-H8 (black) and the wt-NTSR1-H8 (red).

### References

- (1) Shibata, Y.; Gvozdenovic-Jeric, J.; Love, J.; Kloss, B.; White, J. F.; Grisshammer, R.; Tate, C. *G. Biochim. Biophys. Acta.* **2013**, *1828*, 1293.
- (2) Egloff, P.; Hillenbrand, M.; Klenk, C.; Batyuk, A.; Heine, P.; Balada, S.; Schlinkmann, K. M.; Scott, D. J.; Schutz, M.; Pluckthun, A. *Proc. Natl. Acad. Sci. U.S.A.* **2014**, *111*, E655.
- (3) Lee, S.; Bhattacharya, S.; Grisshammer, R.; Tate, C.; Vaidehi, N. *J. Phys. Chem. B.* **2014**, *118*, 3355.
